# Supplementary material
Source: publisher figshare collection journal article supplement (https://tandf.figshare.com/articles/dataset/_/25143864)
Supplement: Supplementary file 1 [file 1]

**~~Post-fire dietary adaptation by red foxes in a Mediterranean area during the warm season: a small mammals’ selection study (titolo on corrisponde, Dessì)~~**

~~Benedetta Baldeschi, Orlando Tomassini, Gianni Bedini, Giulio Petroni, Dimitri Giunchi, Alessandro Massolo~~

SUPPLEMENTAL DATA

**~~Supplementary material~~**

Fig. S1. ⎯Diversity curve (mean ± standard error) estimated through the Brillouin index (Hb) based on 113 red fox faecal samples collected in the Monte Pisano mountain system in Tuscany, Italy, from 19 May to 23 July 2021, 3 years after a fire.

**
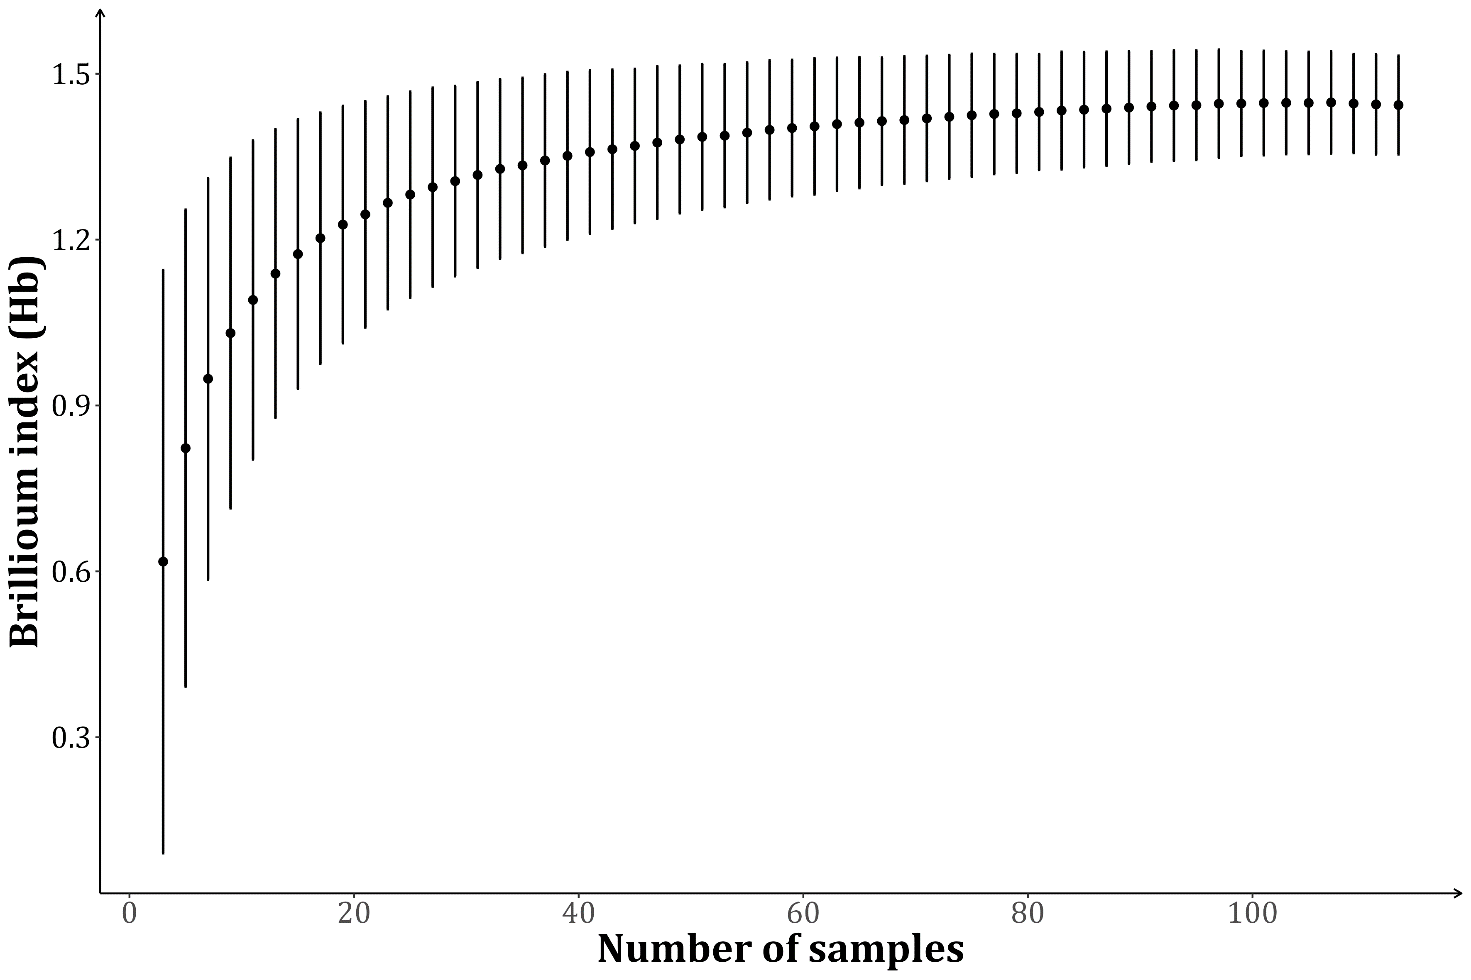
**

Fig. S2. ⎯Relative frequency of occurrences (RFO%) and relative volume (RV%) occupied of small mammal species in 113 red fox faecal samples collected in the Monte Pisano mountain system in Tuscany, Italy, from 19 May to 23 July 2021, 3 years after a fire.

**
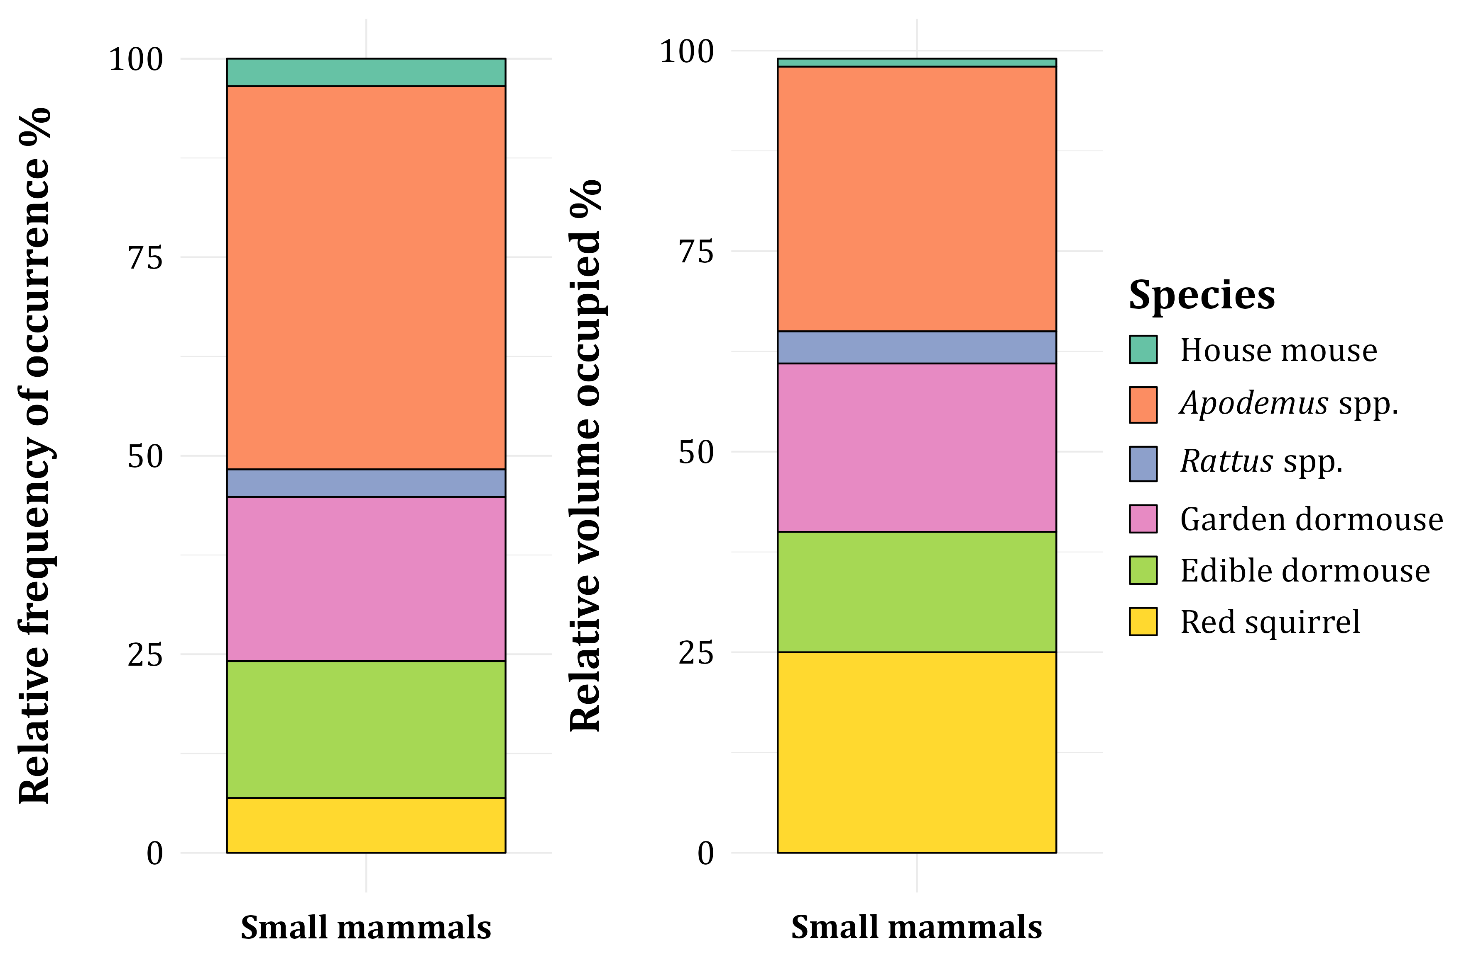
**

Fig. S3. ⎯Diet of the red fox based on *N* = 113 faecal samples collected in the Monte Pisano mountain system in Tuscany, Italy, from 19 May to 23 July 2021, 3 years after a fire. Absolute frequency of occurrence (%) plotted versus the estimated relative volume (%) of each food item: (A) fruits and seeds, (B) small mammals, (C) large wild mammals, (D) lagomorphs, (E) domestic mammals, (F) birds, (G) invertebrates, (H) garbage. Isopleths link points with the same total volume % in diet.

**
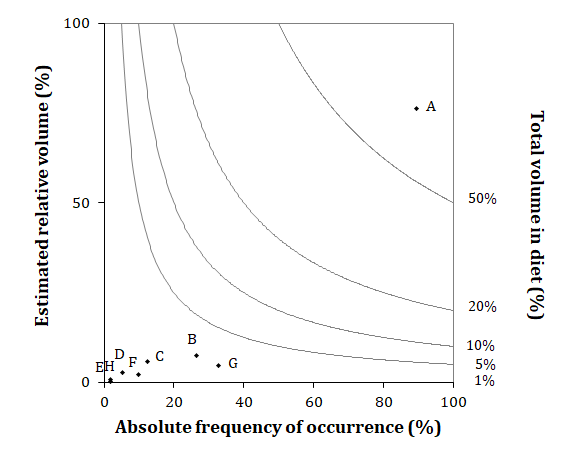
**

Please, change Estimated Relative Volume to Estimated relative volume, Absolute Frequency of Occurrence to Absolute frequency of occurrence and Total Volume to Total volume

Table S1.

Occupancy (*ψ)* and Hair indices (HI) values for each taxon identified from hair tubes deployed in the Monte Pisano mountain system in Tuscany, Italy, from 19 May to 23 July 2021, 3 years after a fire (Tomassini et al. unpublished data). Where both occupancy (*ψ)* and HI estimates were calculated, occupancy (*ψ)* values were used. SE = Standard Error.

| Species | Occupancy (*ψ*) | Occupancy SE | Detection (*p*) | Detection SE | HI |
| --- | --- | --- | --- | --- | --- |
| *Crocidura* spp. | 0.69 | 0.084 | 0.14 | 0.06 | 0.32 |
| House mouse | 0.72 | 0.09 | 0.40 | 0.08 | 0.66 |
| *Apodemus* spp. | 0.94 | 0.047 | 0.77 | 0.046 | 0.94 |
| Voles | 0.52 | 0.16 | 0.20 | 0.07 | 0.34 |
| Black rat | – |  |  |  | 0.02 |
| Garden dormouse | 0.39 | 0.12 | 0.48 | 0.09 | 0.32 |
| Edible dormouse | – |  |  |  | 0.10 |
| Hazel dormouse | – |  |  |  | 0.06 |
| Red squirrel | – |  |  |  | 0.36 |
